# Supplementary material
Source: PubMed Central journal article supplement (PMC2783680)
Supplement: NIHMS121906-supplement-Supplementary_Data.pdf [file NIHMS121906-supplement-Supplementary_Data.pdf]

**Supplementary Online TABLE 1: Modulators that affect the permeability of the blood-brain barrier**

| Pathogenic Event             | Mediator                                 | Mechanism                                                                                                            | Examples                         | Effect on BBB                                        | Diseases Implicated                                              |
|------------------------------|------------------------------------------|----------------------------------------------------------------------------------------------------------------------|----------------------------------|------------------------------------------------------|------------------------------------------------------------------|
| Bacterial or viral infection | LPS                                      | EC activation<br>P-glycoprotein regulation<br>Systemic cytokine secretion                                            |                                  | ↓                                                    | Bacterial meningitis <sup>73</sup>                               |
|                              | Viral proteins                           | Tight junction dysfunction by HIV-infected monocytes; activations of perivascular macrophages and sentinel microglia | HIV                              | ↓                                                    | HIV encephalitis <sup>74</sup>                                   |
| Systemic inflammation        | Cytokines                                | EC activation<br>Tight junction dysfunction                                                                          | TNF $\alpha$                     | ↓ ↑                                                  | Parkinson's disease <sup>27, 75, 76</sup>                        |
|                              |                                          |                                                                                                                      | IL1 $\beta$                      | ↓                                                    | Multiple sclerosis <sup>28</sup><br>Meningitis <sup>28</sup>     |
|                              |                                          |                                                                                                                      | IL6                              | ↓                                                    | Bacterial meningitis <sup>29</sup><br>Meningococcal septic shock |
|                              |                                          |                                                                                                                      | IFN $\alpha/\beta$ <sup>35</sup> | ↑                                                    |                                                                  |
|                              | Circulating antibodies <sup>77, 78</sup> | EC activation?<br>Receptor mediated endocytosis?                                                                     | Anti-FHA antibodies              | ↓                                                    | <i>Bordetella Pertussis</i> infections ?                         |
|                              |                                          | Anti-AQ4 antibodies                                                                                                  | ↓                                | Devic's disease (neuromyelitis optica) <sup>78</sup> |                                                                  |
| Stress, trauma, ischemia     | Epinephrine <sup>30, 33</sup>            | Increased blood flow due to transient hypertension?                                                                  | Epinephrine                      | ↓                                                    | Hypertension                                                     |
|                              | Glutamate <sup>79, 80</sup>              | Vasodilatation?<br>EC activation?                                                                                    | Glutamate<br>MSG in food         | ↓                                                    | Ischemic stroke<br>Neurodegenerative diseases                    |
|                              | Vasoactive substances <sup>81, 82</sup>  | Activation of arachidonic acid cascade <sup>81</sup><br>H2R-dependent activation of adenylate cyclase <sup>82</sup>  | Bradykinin                       | ↓                                                    | Ischemic stroke                                                  |
|                              |                                          |                                                                                                                      | Histamine                        | ↓                                                    | Ischemic stroke                                                  |
| Hormonal alterations         | Estrogen <sup>37, 38</sup>               | Inhibition of MMP2 and MMP9                                                                                          | 17 $\beta$ estradiol             | ↑                                                    | Alzheimer's disease<br>Ischemia                                  |
|                              | Glucocorticoids <sup>36</sup>            | Regulation of angiopoietin and VEGF                                                                                  | Dexamethasone                    | ↑                                                    | Rheumatoid Arthritis<br>SLE                                      |
| Addictive substances         | Ethanol <sup>83, 84</sup>                | Choroid plexus dysfunction                                                                                           | Ethanol                          | ↓                                                    | Wernicke's encephalopathy                                        |
|                              | Narcotics <sup>31</sup>                  | Tight junction dysfunction.<br>Increased leukocyte migration<br>Vasculitis                                           | Cocaine                          | ↓                                                    | HIV encephalitis                                                 |
|                              | Nicotine <sup>32</sup>                   | Tight junction modulation over nicotinic acetylcholine receptors                                                     | Nicotine                         | ↓                                                    |                                                                  |
|                              | Caffeine <sup>85, 86</sup>               | Blockade of alterations on junctional proteins (induced by neurotoxins and other agents)                             | Caffeine                         | ↑                                                    | Alzheimer's disease<br>Parkinson's disease                       |

Abbreviations: AQ4, aquaporin 4; EC, endothelial cell; Anti-FHA; Anti-filamentous hemagglutinin; H2R, histamine 2 receptor; HIV, human immuno-deficiency virus; LPS, lipopolysaccharide; MMP2, matrix metallo-protein 2; MMP9, matrix metallo-protein 9; SLE, systemic lupus erythematosus; VEGF, vascular endothelial growth factor.
